# Supplementary material
Source: Royal Society of Chemistry journal article supplement (doi:10.1039/d6ew00171h)
Supplement: d6ew00171h1.pdf [file d6ew00171h1.pdf]

1

2

## Supporting Information for

3 Evaluating Interferences in the External Calibration Method for

4 Hydroxyl Radical Scavenging Capacity Measurement

5

6

Fateme Mohamadi<sup>1</sup>, Tianyi Chen<sup>2</sup>, Ron Hofmann<sup>2</sup>, Chengjin Wang<sup>1\*</sup>

7 <sup>1</sup>Department of Civil Engineering, University of Manitoba, 15 Gillson St., Winnipeg, Manitoba

8 R3T 5V6, Canada

9 <sup>2</sup>Department of Civil and Mineral Engineering, University of Toronto, 35 St. George Street,

10 Toronto, Ontario M5S 1A4, Canada.

11

12 \*Corresponding author:

13 Chengjin Wang, Ph.D., P.Eng.

14 Dept. Civil Engineering, University of Manitoba

15 15 Gillson St., Winnipeg, Manitoba, Canada R3T 5V6

16 Tel.: 204-474-8381

17 Email: [chengjin.wang@umanitoba.ca](mailto:chengjin.wang@umanitoba.ca)

18

19

## 20 1. Collimated beam setup diagram

21 Figure S1 shows the diagram of collimated beam setup to generate radical species. The setup was  
22 used for  $\bullet\text{OH}$  and non- $\bullet\text{OH}$  species generation and to measure OH radical scavenging capacity.

23 The lamp enclosed was a 17-W low pressure mercury UV lamp (GPH357T5L/4, Atlantic  
24 Ultraviolet Corporation), and the fluence rate at the surface of the water was approximately 140  
25  $\mu\text{W}/\text{cm}^2$ .

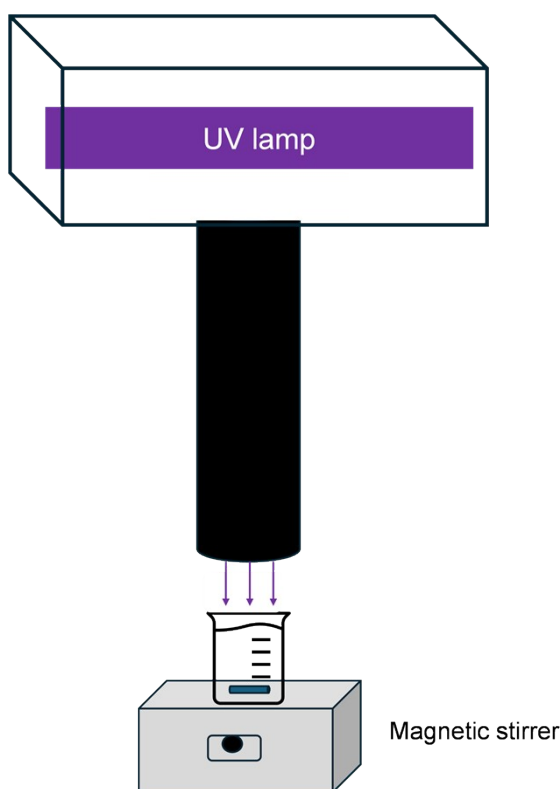

26

27 Fig. S1: Collimated beam setup diagram; a magnetic stirrer was used to continuously mix the  
28 sample while being exposed to UV light.

29

## 30 2. Quenching residual chloramines

31 A stock solution of chloramine was prepared by mixing  $\text{NH}_4\text{Cl}$  and  $\text{NaOCl}$  in Milli-Q water at a  
32 1:1 molar ratio. This chloramine solution was then added to the synthetic water to create a range

33 of chloramine concentrations from 0 to 12 mg/L as Cl<sub>2</sub>. After 30 minutes, the chloramine  
34 concentrations in the samples were measured using a HACH colorimeter (HACH 58700 Pocket  
35 Colorimeter Chlorine MR/HR). After chloramine addition, each sample was split in two: one part  
36 was measured for HRSC without quenching chloramines, while the other part's HRSC was  
37 measured after precisely chloramine quenching using sulfite or bisulfite. The scavenging capacity  
38 was determined using the external calibration method with a collimated beam apparatus (Fig. S1)  
39 as described by Wang et al.<sup>1</sup>

40 Excess addition of sulfite or bisulfite would result in an error in the measurement of scavenging  
41 capacity. It is therefore required to use the precise stoichiometric quantity of sulfite (or bisulfite)  
42 to completely quench chloramines. In this regard, sodium sulfite (or sodium bisulfite) was  
43 incrementally added to the sample and then the total residual chlorine concentration after each  
44 addition was measured. A curve demonstrating the residual chlorine concentration (as Cl<sub>2</sub>) against  
45 the volume of Na<sub>2</sub>SO<sub>3</sub> (or NaHSO<sub>3</sub>) stock solution added was created. The dose of sulfite (or  
46 bisulfite) required to precisely quench the residual total chlorine is determined by extending the  
47 curve of residual total chlorine against sulfite (or bisulfite) dose to the point where the residual  
48 total chlorine reaches zero.

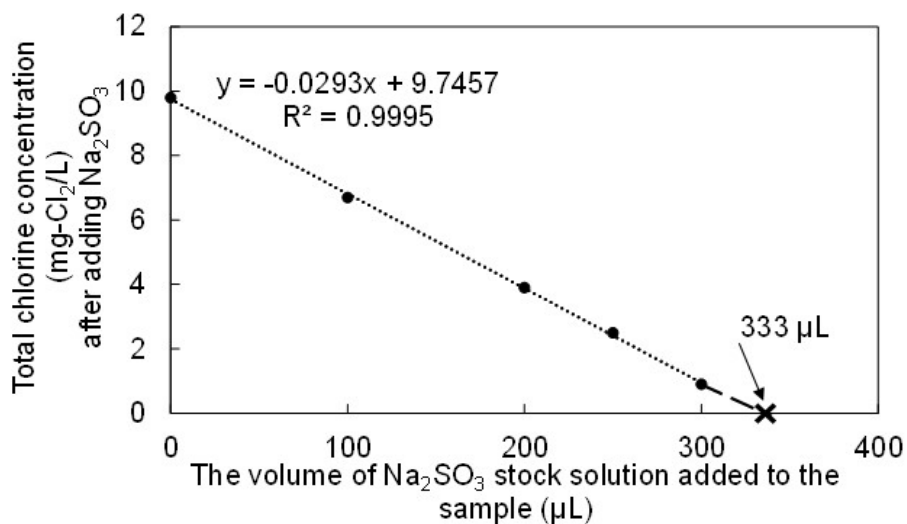

49

50 Fig. S2: Residual concentration of total chloramine (mg- Cl<sub>2</sub>/L) in diluted tap water sample  
 51 (TOC < 0.3 mg-C/L) after incrementally addition of Na<sub>2</sub>SO<sub>3</sub> at room temperature. The  
 52 intersection point represents zero total chloramine concentration, and 333 µL is the calculated  
 53 volume of Na<sub>2</sub>SO<sub>3</sub> stock solution, determined from the plot equation, which is required to  
 54 completely consume all chloramines.

55

### 56 3. Effect of bromide on H<sub>2</sub>O<sub>2</sub> decay

57 Fig. S3 shows the decay of H<sub>2</sub>O<sub>2</sub> (initial concentration: 50 mg/L) in Milli-Q water in the presence  
 58 of bromide (0, 2, and 10 mg/L) after 6 min of UV exposure. The extent of H<sub>2</sub>O<sub>2</sub> decay was minimal  
 59 and was not expected to affect the hydroxyl radical generation rate.

60

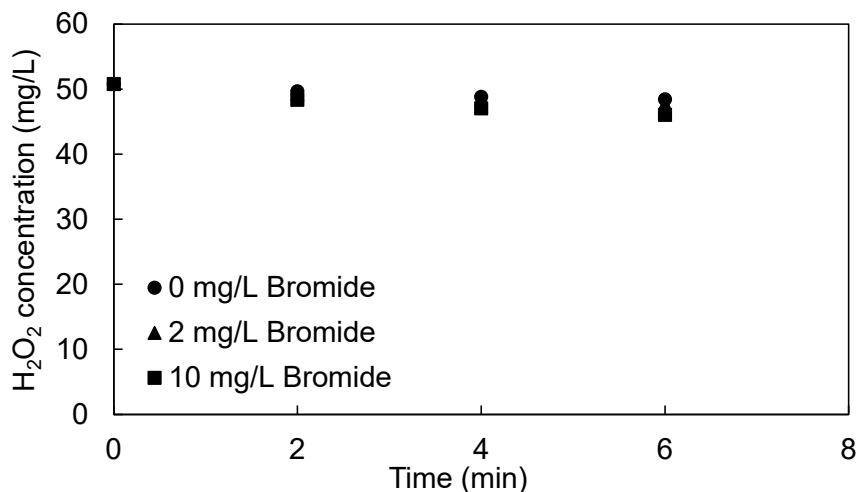

61

62 Fig. S3: Decay of H<sub>2</sub>O<sub>2</sub> in the presence of different concentrations of bromide under the UV  
 63 exposure over time in Milli-Q water and at the room temperature. Error bars indicate the min and  
 64 max of the duplicated samples.

65

66 **4. Chloramine species proportion in total chlorine**

67 Fig. S4 indicates the proportion of monochloramine and dichloramine at different concentrations  
 68 of total chlorine in synthetic water at pH = 5.5. Mono and dichloramine concentrations were  
 69 measured by Indophenol method using the HACH Monochlor-F reagents. As shown in Fig. S4,  
 70 both mono- and dichloramine were present in the sample (approximately 20–30% dichloramine  
 71 and 70–80% monochloramine). The concentration of trichloramine and free chlorine were  
 72 negligible.

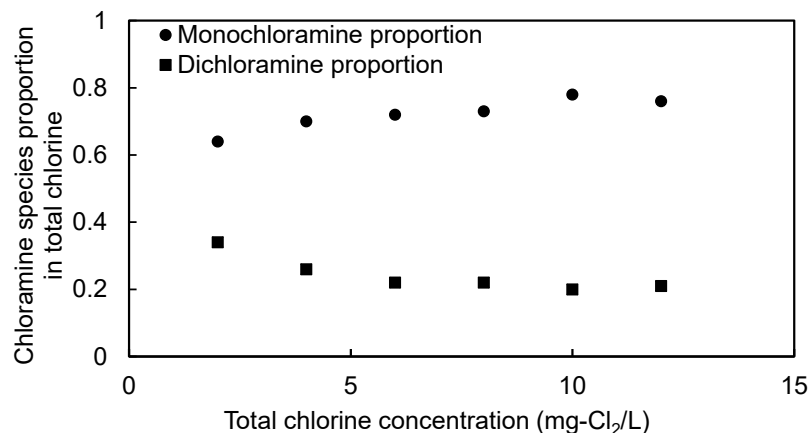

73

74 Fig. S4: The proportion of monochloramine and dichloramine at different concentrations of total  
 75 chlorine at pH=5.5 and room temperature in diluted tap water (TOC < 0.3mg-C/L). The graph  
 76 shows single experimental data.

77

### 78 5. Quenching chloramines with bisulfite

79 Fig. S5 shows the HRSC of samples before and after quenching chloramines using sodium bisulfite  
 80 in the synthetic water sample. Sodium bisulfite decreased the pH level to a low as 3.8 at a dosage  
 81 of 5.8 mg/L, potentially invalidating the calibration curve. The reason for this impact on the  
 82 calibration curve is not clear, but one possible explanation could be related to the molecular  
 83 structure of methylene blue which changes at low pH levels. This is supported by a slight increase  
 84 in absorbance (6%) at the dye's signature wavelength of 664 nm when pH is reduced from higher  
 85 levels to lower one (e.g., ≤4), as shown in Fig. S6.

86

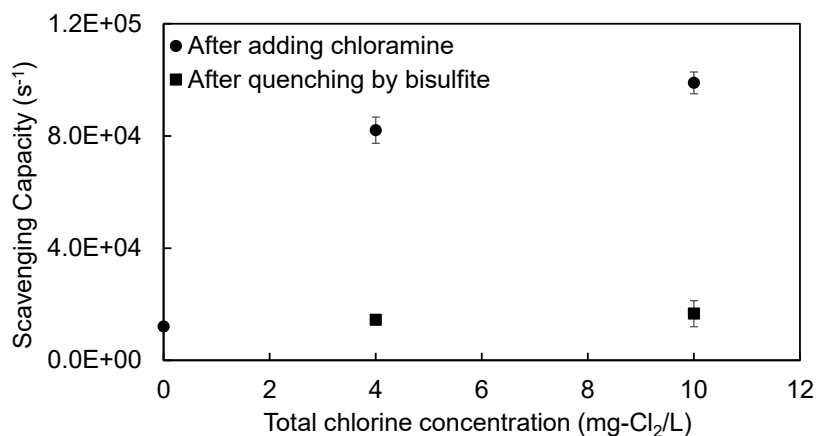

87

88 Fig. S5: Scavenging capacity of samples before and after quenching chloramine using sodium  
89 bisulfite in diluted tap water at room temperature (initial pH = 5.5 and TOC < 0.3 mg-C/L). Error  
90 bars indicate the min and max of the duplicated samples.

91

92

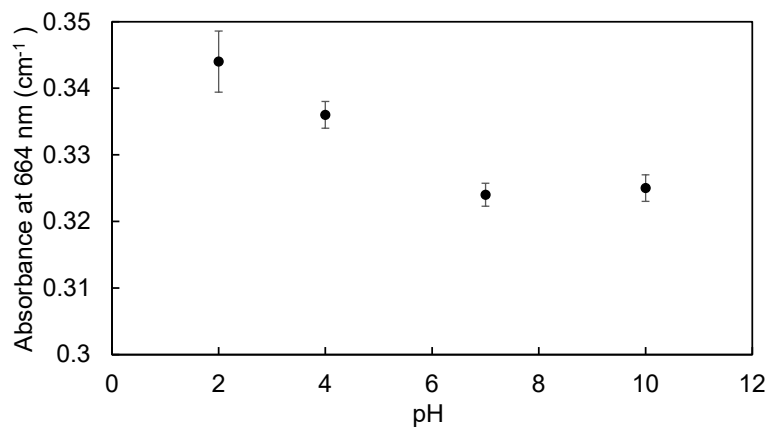

93

94 Fig. S6: Methylene blue (MB) absorbance (at 664 nm) at different pH levels in Milli-Q water at  
95 room temperature ([MB] = ~5 μM). Error bars indicate the min and max of the duplicated  
96 samples.

97 **6. Statistical analysis result**

98 Statistical analysis of the slopes of MB decay curves (Fig. 1 and Fig. 2) indicated that, in most  
 99 cases, MB decay rates in the presence of radicals were not significantly different from those  
 100 under direct photolysis ( $p > 0.05$ ), suggesting negligible reactivity between MB and non- $\bullet\text{OH}$   
 101 radical species. A significant difference was observed only in the presence of humic acid ( $p <$   
 102  $0.001$ ), likely attributable to its light-attenuating effect.

103 Table S1. Statistical analysis of Fig. 1: significance of MB decay rates under different conditions  
 104 and direct photolysis using t-tests

| Condition                                                                      | p-Value | Significance    |
|--------------------------------------------------------------------------------|---------|-----------------|
| 1.47 mM H <sub>2</sub> O <sub>2</sub> , 5 $\mu\text{M}$ MB and 20 mM Carbonate | 0.23    | Not Significant |
| 14.7 mM H <sub>2</sub> O <sub>2</sub> , 5 $\mu\text{M}$ MB and 20 mM Carbonate | 0.09    | Not Significant |

105

106 Table S2. Statistical analysis of Fig. 2: significance of MB decay rates under different conditions  
 107 and direct photolysis using t-tests

| Condition                 | p-Value | Significance    |
|---------------------------|---------|-----------------|
| 650 mM IPA                | 0.10    | Not Significant |
| 700 mM Methanol           | 0.42    | Not Significant |
| 113 mM Phenol             | 0.14    | Not Significant |
| 800 mM Acetone            | 0.44    | Not Significant |
| 10 mM Ethanol             | 0.11    | Not Significant |
| 250 mM Acetonitrile       | 0.10    | Not Significant |
| 100 mM Acetic Acid        | 0.20    | Not Significant |
| ~ 13 mM Humic Acid (as C) | <0.001  | Significant     |

108

## 109 Reference

110 1. Wang, C.; Rosenfeldt, E.; Li, Y.; Hofmann, R., External Standard Calibration Method To  
 111 Measure the Hydroxyl Radical Scavenging Capacity of Water Samples. *Environmental science*  
 112 *& technology* **2020**, *54*, (3), 1929-1937.

113
